# Supplementary material for: Casposase structure and the mechanistic link between DNA transposition and spacer acquisition by CRISPR-Cas
Source: eLife journal article supplement (doi:10.7554/elife.50004), 2020-01-08
Supplement: supp [file elife-50004-supp-v1.zip]

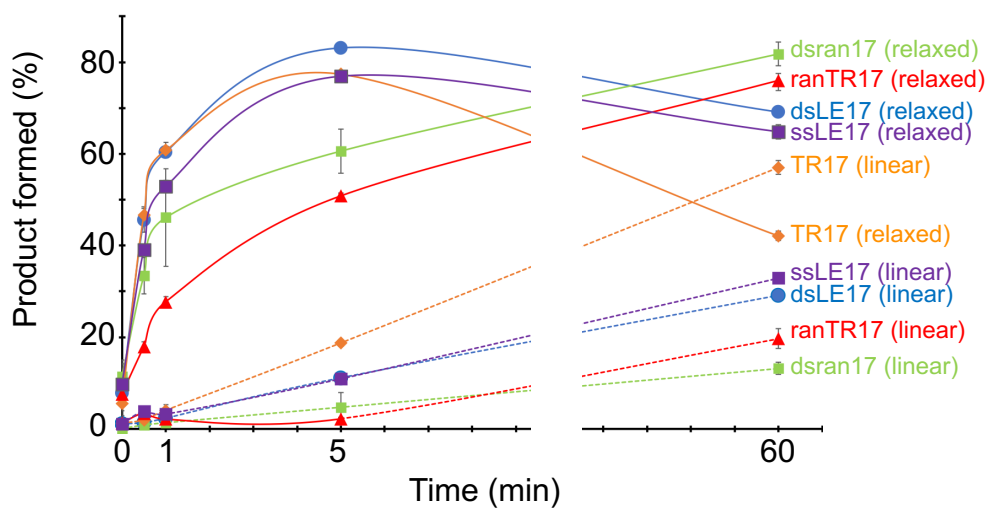

**Figure 2 – figure supplement 1.** Quantitation of time course of product formation. Data points are the mean of three replicates, and the error bars represent the standard deviation. The gap indicates there are no data points between 5 and 60 min.
