# Supplementary material for: Casposase structure and the mechanistic link between DNA transposition and spacer acquisition by CRISPR-Cas
Source: eLife journal article supplement (doi:10.7554/elife.50004), 2020-01-08
Supplement: supp [file elife-50004-supp-v1.zip]

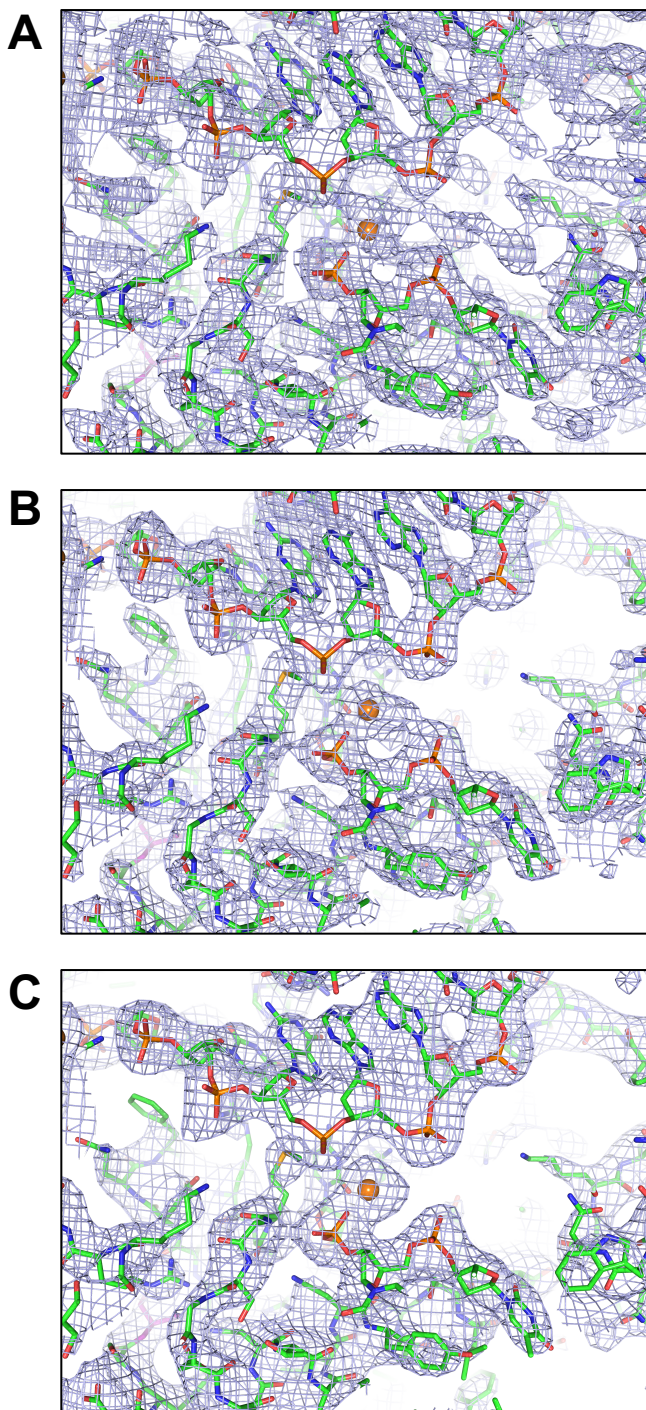

**Figure 5 – figure supplement 1.** Representative electron densities.

(A) Experimental electron density after multi-domain non-crystallographic averaging at 3.2 Å resolution.

(B) 2mFo-DFc electron density after the final Buster refinement at 3.1 Å resolution.

(C) Composite simulated annealed omit map based on the final Buster-refined coordinates at 3.1 Å resolution. In all panels, electron density was contoured at the 1 sigma level and the final Buster-refined structure was overlaid. The orange sphere corresponds to a bound  $\text{Ca}^{2+}$  ion from the crystallization buffer.
