# Supplementary material for: Casposase structure and the mechanistic link between DNA transposition and spacer acquisition by CRISPR-Cas
Source: eLife journal article supplement (doi:10.7554/elife.50004), 2020-01-08
Supplement: supp [file elife-50004-supp-v1.zip]

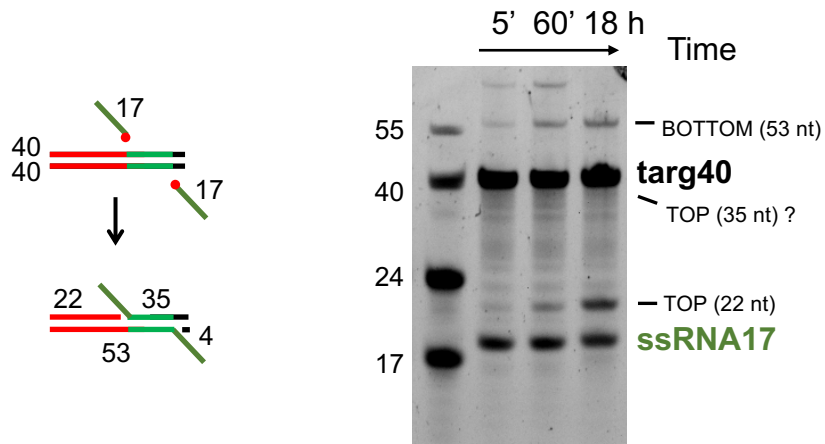

**Figure 3 – figure supplement 1.** Integration of ssRNA into targ40. The red circles in the schematic indicate 3'-OH groups of the RNA substrate. The expected 35 nt product of top strand insertion is not observed; it is possible it has altered mobility and is hidden under the targ40 substrate band or may have been disintegrated (the reverse reaction of integration). Note the altered mobilities of ssRNA17 relative to the 17mer DNA marker and the 53-nt DNA/RNA hybrid product of bottom strand integration relative to the 55mer DNA marker.
