# Supplementary material for: Casposase structure and the mechanistic link between DNA transposition and spacer acquisition by CRISPR-Cas
Source: eLife journal article supplement (doi:10.7554/elife.50004), 2020-01-08
Supplement: supp [file elife-50004-supp-v1.zip]

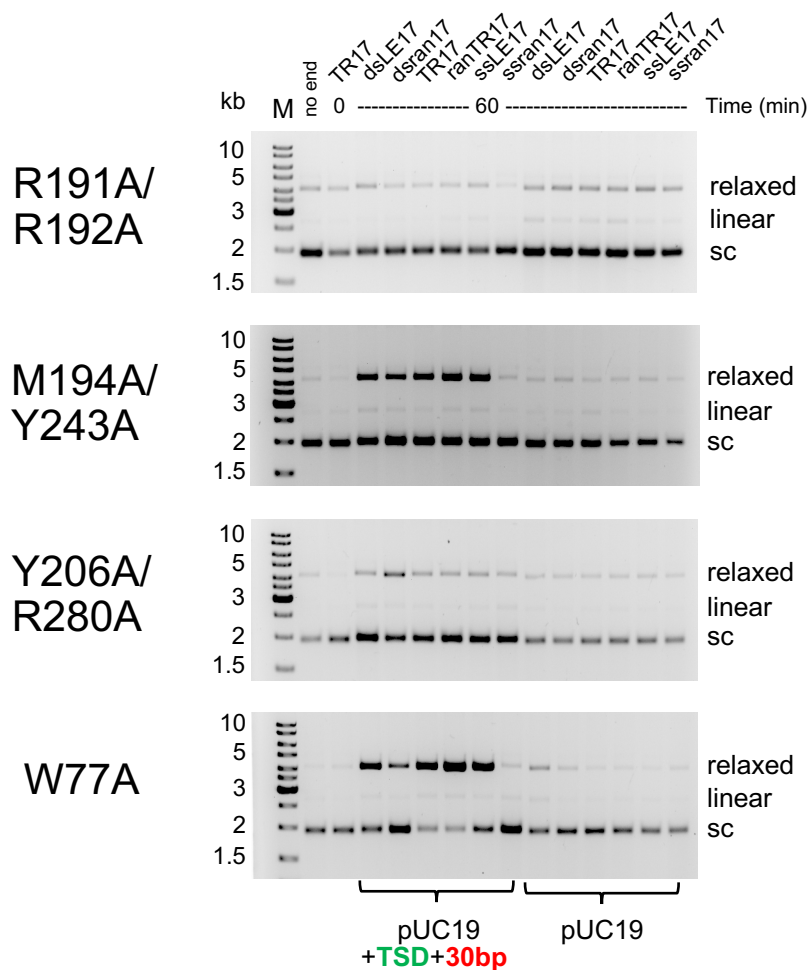

**Figure 7 – figure supplement 1.** Comparison of integration activity of purified casposase mutants with casposon end oligonucleotides. For the “no end” reactions, reactions were for 60 min using pUC19. The TR17/T=0 reactions were also run using pUC19 as the target substrate. Reactions were carried out twice, and representative gels are shown.
