# Supplementary material for: Casposase structure and the mechanistic link between DNA transposition and spacer acquisition by CRISPR-Cas
Source: eLife journal article supplement (doi:10.7554/elife.50004), 2020-01-08
Supplement: supp [file elife-50004-supp-v1.zip]

casposase

*A. fulgidus* Cas1

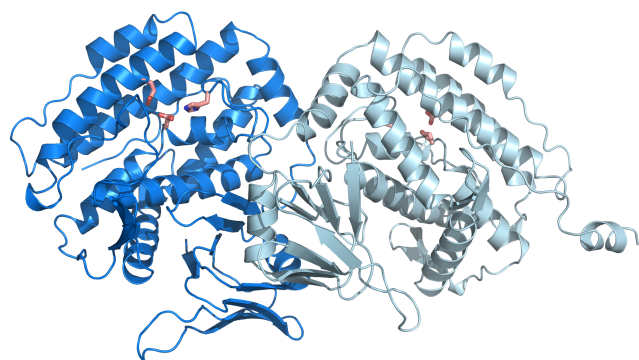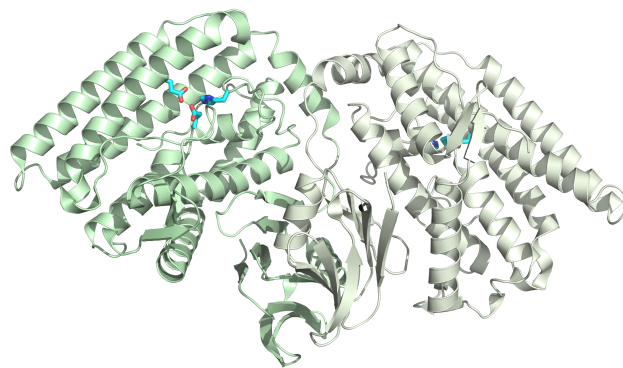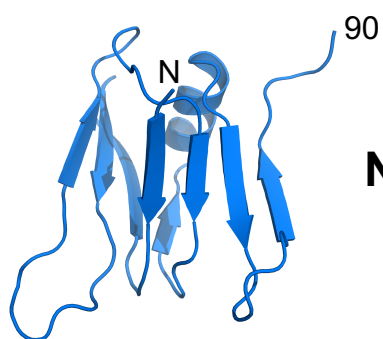

**N-term**

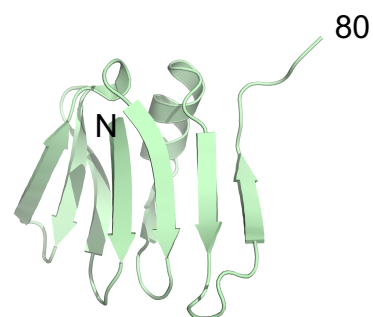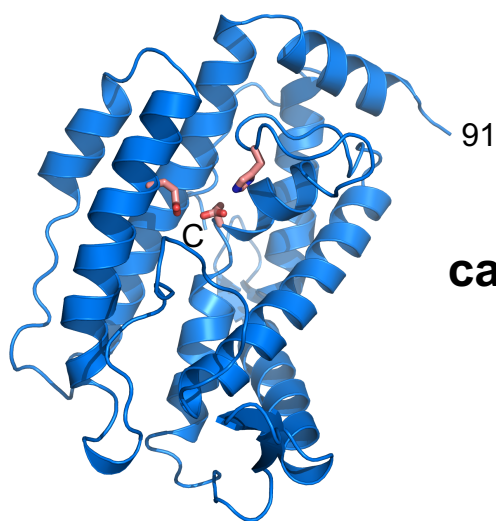

**catalytic**

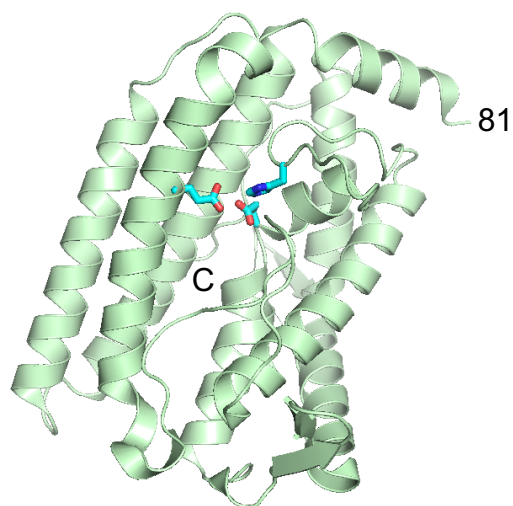

**Figure 5 – figure supplement 2.** Side-by-side views of the aligned structures of the casposase and Cas1 from *A. fulgidus* (PDB ID 4n06; Kim et al., 2013). Alignment is based on the catalytic monomer of the casposase. Residue numbers are indicated. Active site residues are shown as sticks.
