# Supplementary material for: Casposase structure and the mechanistic link between DNA transposition and spacer acquisition by CRISPR-Cas
Source: eLife journal article supplement (doi:10.7554/elife.50004), 2020-01-08
Supplement: supp [file elife-50004-supp-v1.zip]

Archive with 12 entries (12 files):
- elife_poa_e50004_Figure_4_figure_supplement_2.pdf
- elife_poa_e50004_Transparent_Reporting_File.docx
- elife_poa_e50004_Figure_2_figure_supplement_1.pdf
- elife_poa_e50004_Figure_5_figure_supplement_2.pdf
- elife_poa_e50004_Figure_3_figure_supplement_1.pdf
- elife_poa_e50004_Video_1.mp4
- elife_poa_e50004_Figure_4_figure_supplement_1.pdf
- elife_poa_e50004_Figure_5_figure_supplement_3.pdf
- elife_poa_e50004_Supplementary_file_1.docx
- elife_poa_e50004_Figure_5_figure_supplement_4.pdf
- elife_poa_e50004_Figure_7_figure_supplement_1.pdf
- elife_poa_e50004_Figure_5_figure_supplement_1.pdf
