# Supplementary material for: Casposase structure and the mechanistic link between DNA transposition and spacer acquisition by CRISPR-Cas
Source: eLife journal article supplement (doi:10.7554/elife.50004), 2020-01-08
Supplement: supp [file elife-50004-supp-v1.zip › elife_poa_e50004_Figure_4_figure_supplement_1.pdf]

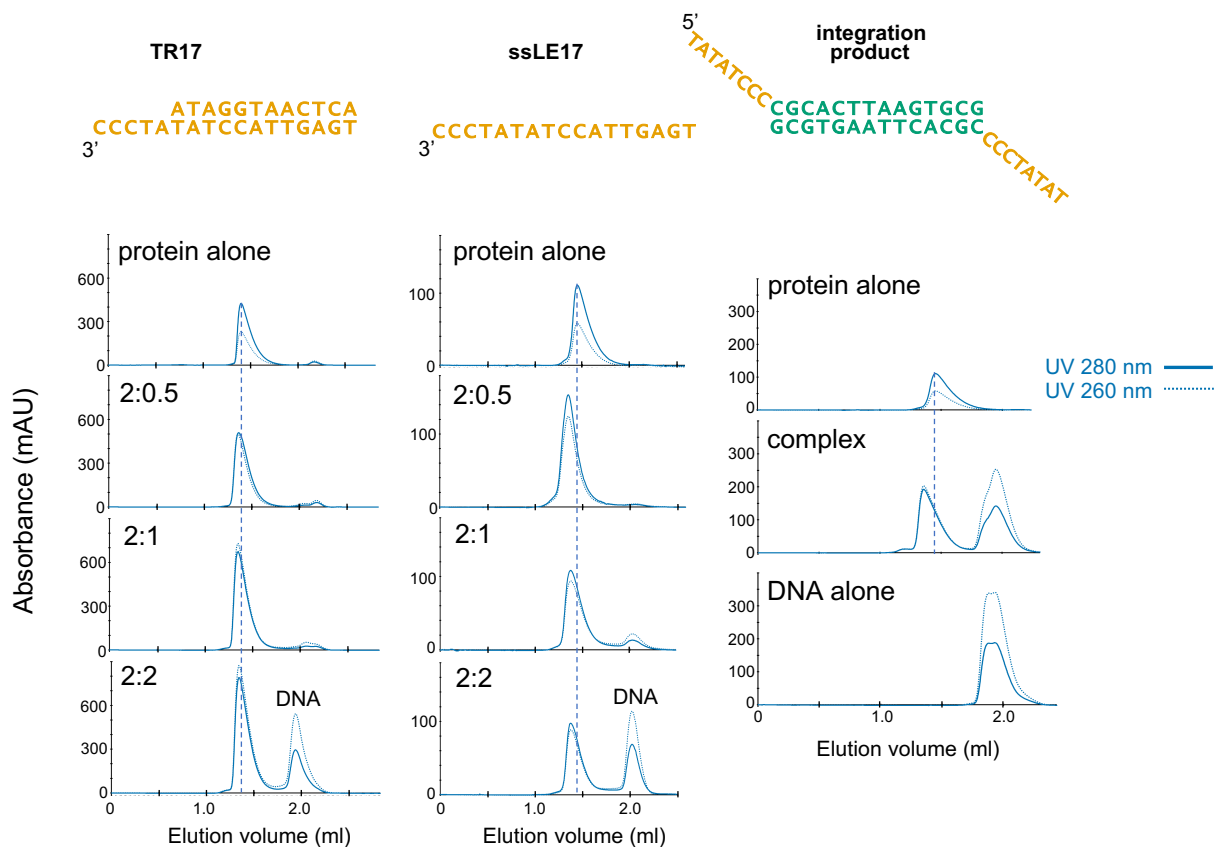

**Figure 4 – figure supplement 1.** Characterization of casposase-DNA complexes by size-exclusion chromatography (SEC) analysis. Samples were mixed at the indicated casposase:DNA ratios and dialyzed into binding buffer prior to injection onto an analytical Superdex 200 Increase 3.2/300 column. Experiments were performed at least three times, and sample chromatograms are shown.
