# Supplementary material for: Casposase structure and the mechanistic link between DNA transposition and spacer acquisition by CRISPR-Cas
Source: eLife journal article supplement (doi:10.7554/elife.50004), 2020-01-08
Supplement: supp [file elife-50004-supp-v1.zip › elife_poa_e50004_Figure_4_figure_supplement_2.pdf]

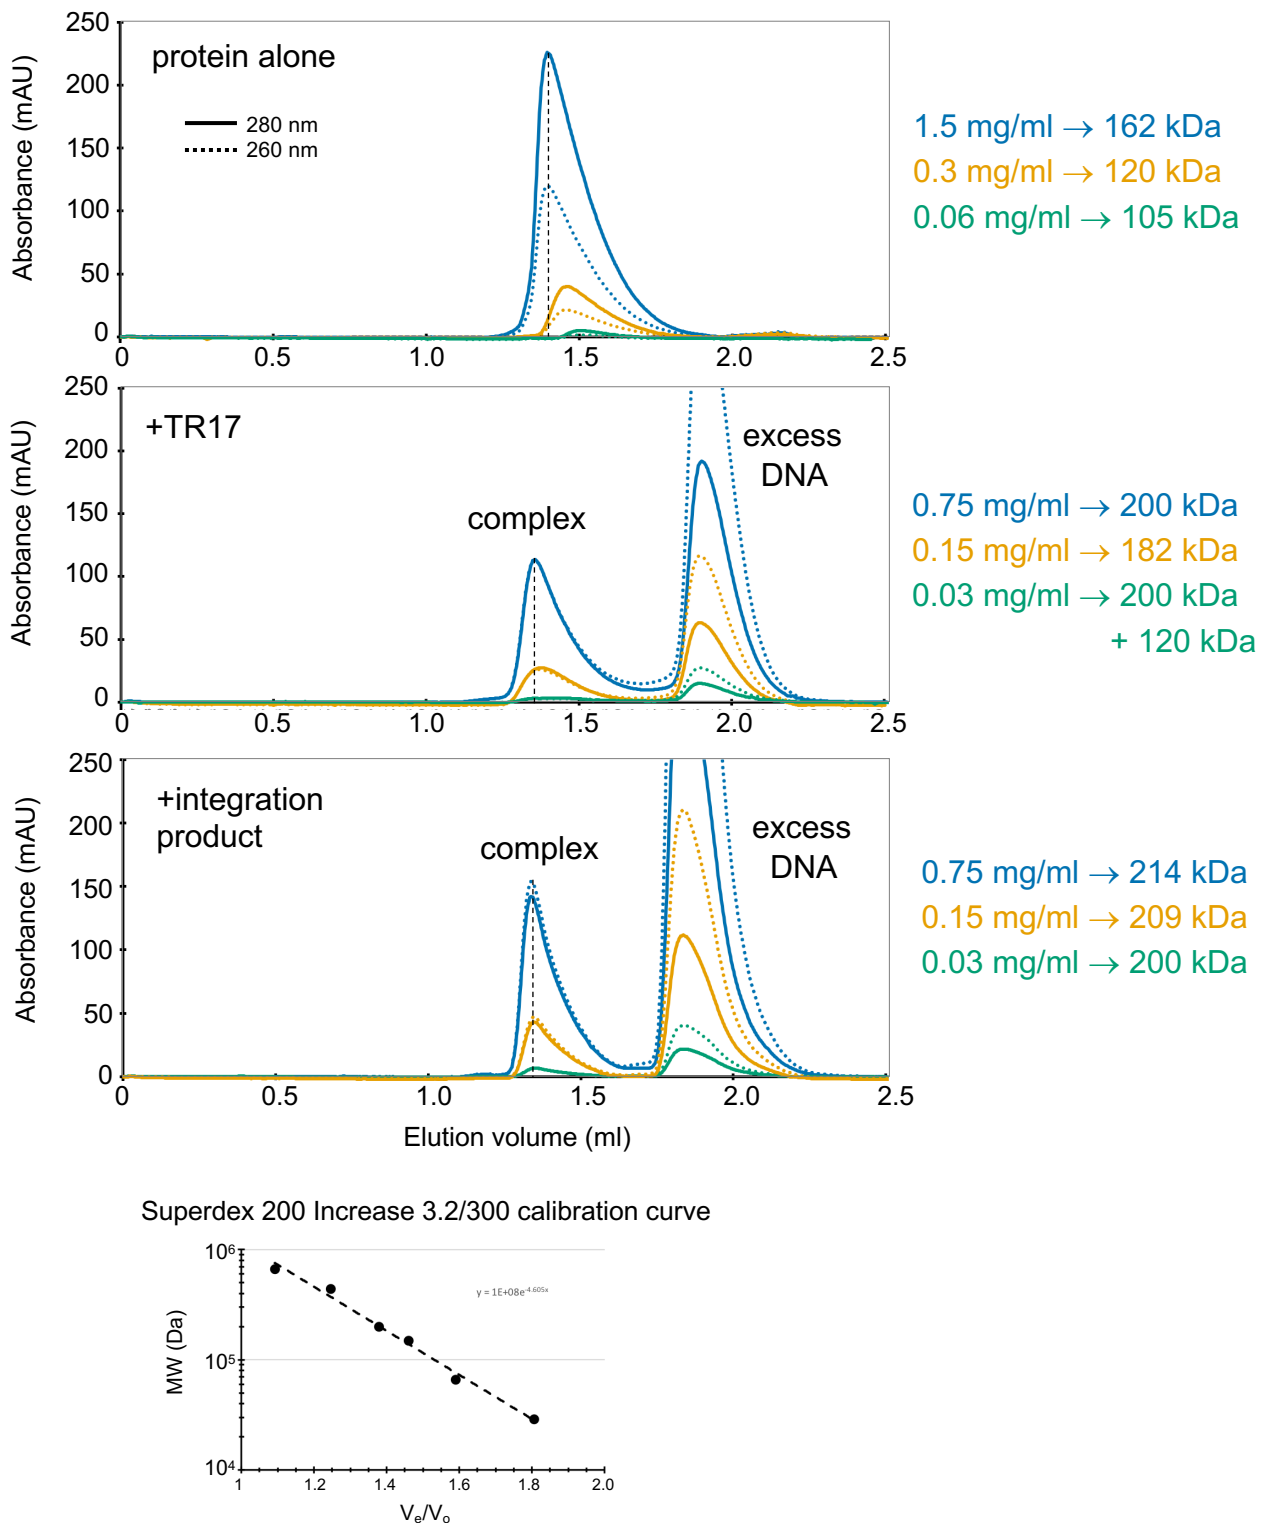

**Figure 4 – figure supplement 2.** Characterization of casposase-DNA complexes by size exclusion chromatography (SEC) on a Superdex 200 Increase 3.2/300 column as a function of protein concentration. Each experiment was performed twice and, in all cases, the elution positions were reproducible within 0.01 ml. The protein concentration used are indicated on the right, and the MWs corresponding to the peaks were determined from the standard curve shown at the bottom.
