# Supplementary material for: Casposase structure and the mechanistic link between DNA transposition and spacer acquisition by CRISPR-Cas
Source: eLife journal article supplement (doi:10.7554/elife.50004), 2020-01-08
Supplement: supp [file elife-50004-supp-v1.zip › elife_poa_e50004_Figure_5_figure_supplement_3.pdf]

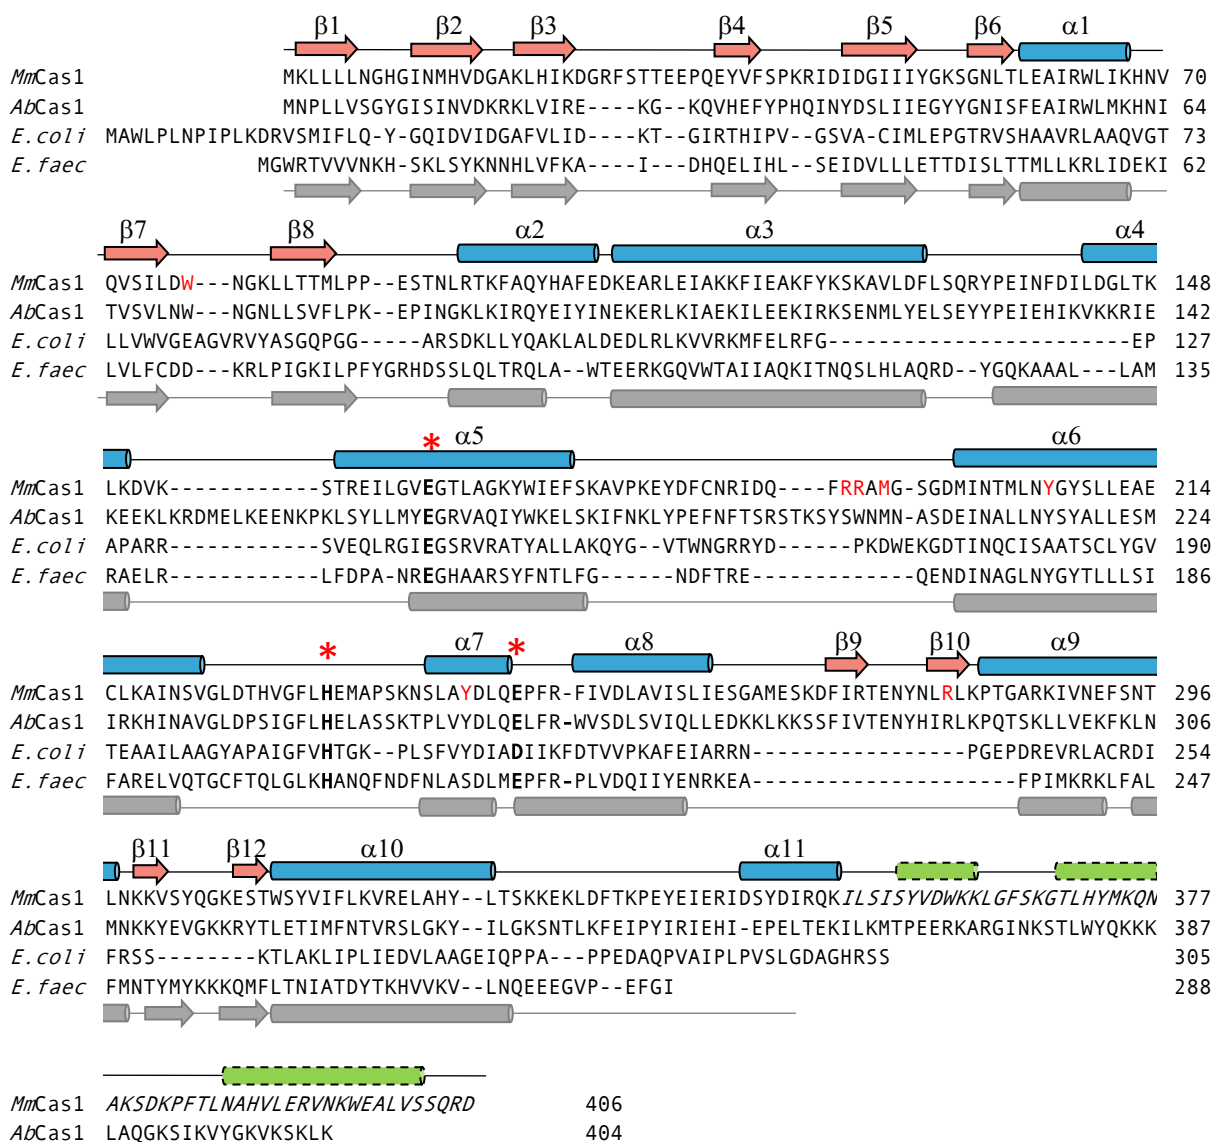

**Figure 5 – figure supplement 3.** Structure-based alignment of *M. mazei* casposase to *E. coli* (5vvk) and *E. faecalis* Cas1 (5xvp). The secondary structure elements on the top are for the casposase; those on the bottom correspond to those of *E. faecalis* (Xiao et al., 2017). Active site residues are marked with \*. Residues mutated in this work are shown in red. Italics indicate the region of the casposase that cannot be assigned to the electron density. Green cylinders indicate predicted a-helices at the casposase C-terminus.
