# Supplementary material for: Casposase structure and the mechanistic link between DNA transposition and spacer acquisition by CRISPR-Cas
Source: eLife journal article supplement (doi:10.7554/elife.50004), 2020-01-08
Supplement: supp [file elife-50004-supp-v1.zip › elife_poa_e50004_Figure_5_figure_supplement_4.pdf]

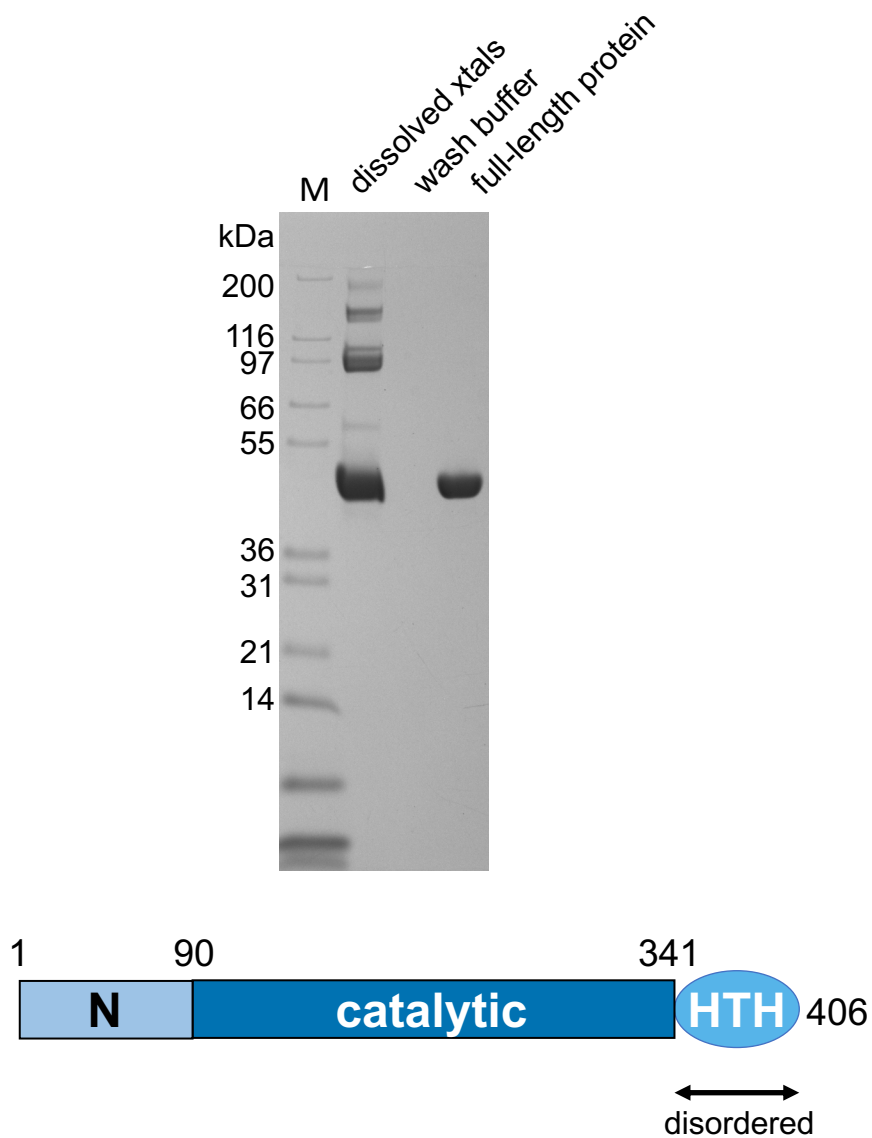

**Figure 5 – figure supplement 4.** SDS-PAGE analysis (4-12% NuPAGE) of dissolved crystals showing that the casposase is not proteolytically degraded. Casposase MW = 49.4 kDa.
